# Supplementary material for: ARID1A Mutations Are Associated with Increased Immune Activity in Gastrointestinal Cancer
Source: MDPI journal article supplement (doi:10.3390/cells8070678), 2019-07-04
Supplement: s1 [file s1]

## Supplementary Figures

**Figure S1. Associations between *ARID1A* mutations and tumor immune signatures in the MSI-L/MSS subtype of GI cancers.** **A.** The associations between *ARID1A* mutations and tumor immune signatures are significantly weaker in the MSI-L/MSS subtype than in all GI cancers in STAD-2 and COAD. *P*: Mann-Whitney U test *P* value. **B.** Immune signatures shows significantly higher enrichment levels in *ARID1A*-mutated STAD-1 than in *ARID1A*-wildtype STAD-1 within the MSS subtype (Mann-Whitney U test,  $P < 0.05$ ). MSI-L: microsatellite instability low. MSS: microsatellite stable. STAD-1: the gastric cancer genomics dataset from the Asian Cancer Research Group (ACRG) [24]. STAD-2: the gastric cancer genomics dataset from *The Cancer Genome Atlas* (TCGA) [25]. COAD: the colon cancer genomics dataset from TCGA [26].

**Figure S2.** Associations between *ARID1A* mutations and overall survival (OS) in individual cancer types in Samstein cohort [31]. Kaplan-Meier survival curves show that *ARID1A* mutations are associated with a better OS in head and neck cancer (log-rank test,  $P = 0.01$ ) and are associated with more favorable OS trends in melanoma, lung cancer, breast cancer, esophagogastric cancer, and colorectal cancer (log-rank test,  $P < 0.25$ ).

## Supplementary Table

Table S1. The gene sets that represent different immune signatures.
