# Supplementary figures and images for: ARID1A Mutations Are Associated with Increased Immune Activity in Gastrointestinal Cancer
Source: MDPI journal article supplement (doi:10.3390/cells8070678), 2019-07-04

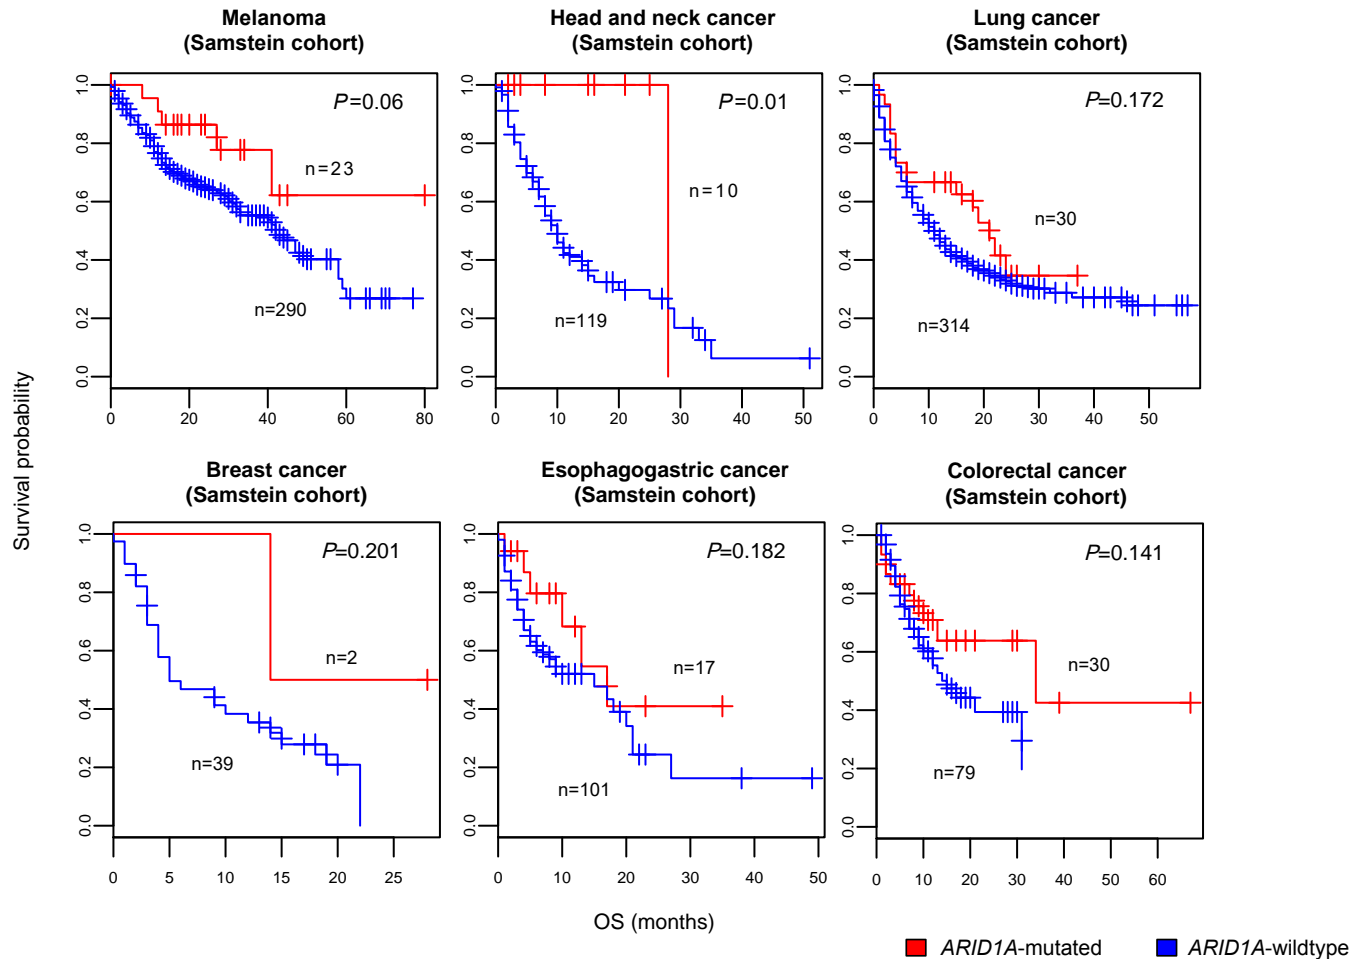

Supplement: s1 [file s1]

**A**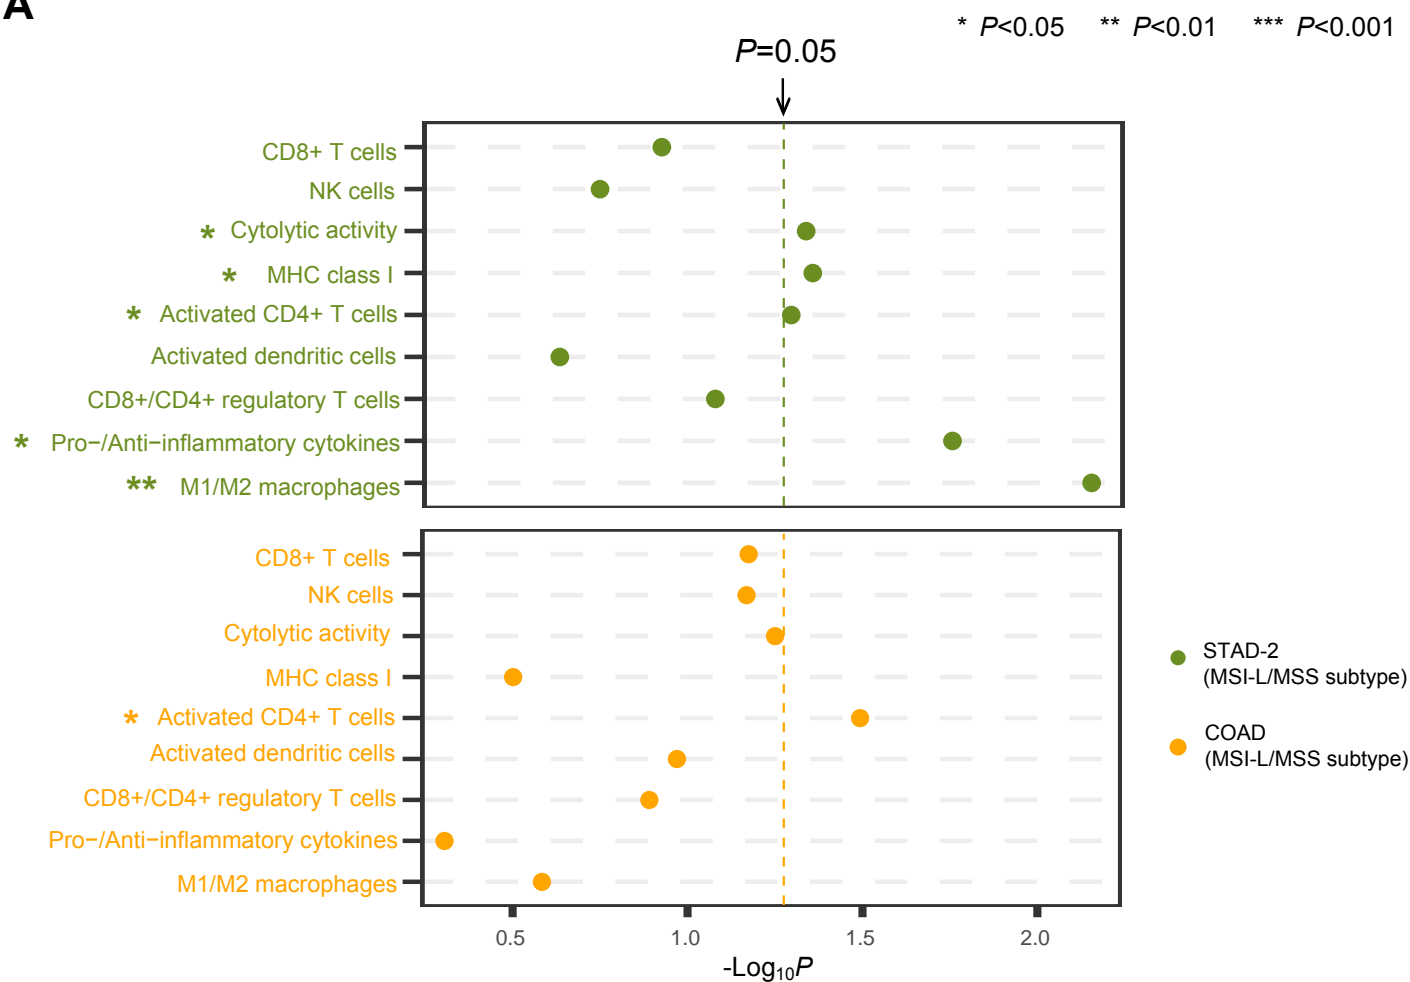**B**

STAD-1 (MSS subtype)

\*  $P < 0.05$     \*\*  $P < 0.01$     \*\*\*  $P < 0.001$ 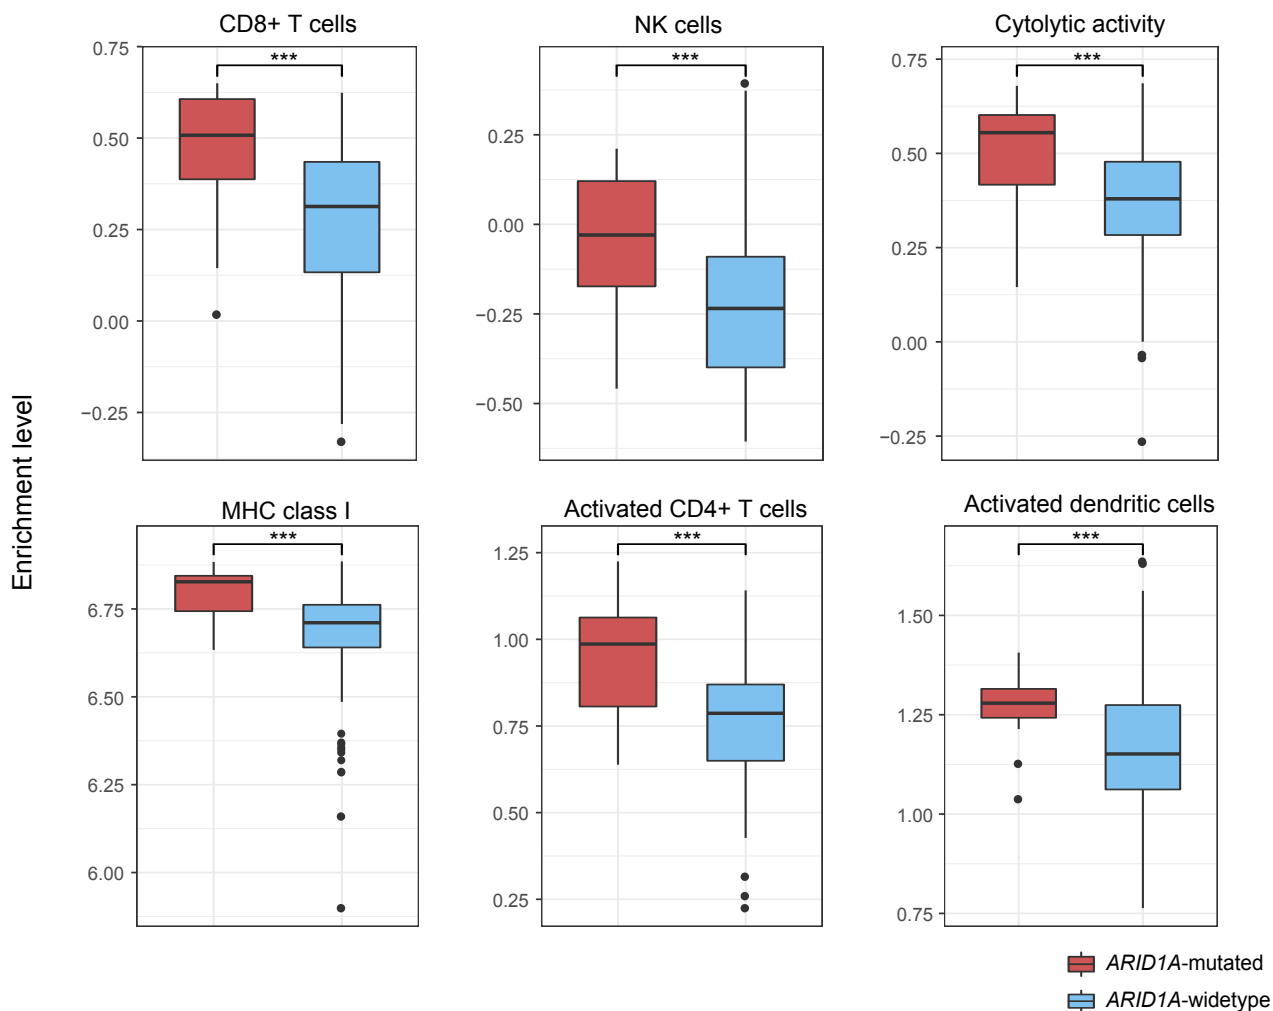

Supplement: s1 [file s1]
